# Supplementary material
Source: PubMed Central journal article supplement (PMC2656358)
Supplement: NIHMS91242-supplement-1_si_001.pdf [file NIHMS91242-supplement-1_si_001.pdf]

Supporting information for:

**“An Altered Transition State for the Reaction of an RNA Model Catalyzed by a Dinuclear Zinc(II) Catalyst”**

Tim Humphry,<sup>†,a</sup> Subashree Iyer,<sup>†,b</sup> Olga Iranzo,<sup>‡,c</sup> Janet R. Morrow,<sup>‡</sup> John P. Richard,<sup>‡</sup> Piotr Paneth,<sup>§</sup> and Alvan C. Hengge<sup>\*†</sup>

<sup>†</sup> *Department of Chemistry and Biochemistry, Utah State University, Logan Utah 84322-0300*

*(alvan.hengge@usu.edu).*

<sup>‡</sup> *Department of Chemistry, University at Buffalo, State University of New York, Buffalo, NY 14260*

<sup>§</sup> *Institute of Applied Radiation Chemistry, Technical University of Lodz, Zeromskiego 116 Zeromskiego 116, 90-924 Lodz, Poland*

**Table of contents:**

|                                       |       |
|---------------------------------------|-------|
| Raw isotope ratio data:               | S2    |
| Kinetic isotope effect data analysis: | S3-S4 |

Raw isotope ratio data (delta values) and fractions of reaction in KIE determinations:

### Uncatalyzed reactions of HpPNP

| <sup>15</sup> N KIE: delta of reactant (average of 3 determinations) = -2.687 |               |                          |                      |
|-------------------------------------------------------------------------------|---------------|--------------------------|----------------------|
| reaction #                                                                    | product delta | residual substrate delta | fraction of reaction |
| 1                                                                             | -2.5          | -1.8                     | 0.57                 |
| 2                                                                             | -2.43         | -2.34                    | 0.67                 |
| 3                                                                             | -2.66         | -2.05                    | 0.62                 |

| 18O leaving group KIE: delta of reactant (average of 3 determinations) = 0.553 |               |                          |                      |
|--------------------------------------------------------------------------------|---------------|--------------------------|----------------------|
| reaction #                                                                     | product delta | residual substrate delta | fraction of reaction |
| 1                                                                              | -1.46         | 5.67                     | 0.610                |
| 2                                                                              | -1.43         | 4.03                     | 0.610                |
| 3                                                                              | -3.77         | 6.65                     | 0.520                |

| 18O nucleophile KIE: delta of reactant (average of 4 determinations) = -1.588 |               |                          |                      |
|-------------------------------------------------------------------------------|---------------|--------------------------|----------------------|
| reaction #                                                                    | product delta | residual substrate delta | fraction of reaction |
| Nuc 1                                                                         | -19.87        | 20.64                    | 0.540                |
| Nuc 2                                                                         | -18.03        | 26.75                    | 0.640                |
| Nuc 3                                                                         | -20.21        | 13.81                    | 0.440                |
| Nuc 4                                                                         | -19.15        | 22.4                     | 0.630                |

### Catalyzed reactions of HpPNP

| <sup>15</sup> N KIE: delta of reactant (average of 3 determinations) = -2.687 |               |                          |                      |
|-------------------------------------------------------------------------------|---------------|--------------------------|----------------------|
| reaction #                                                                    | product delta | residual substrate delta | fraction of reaction |
| 1                                                                             | -3.26         | -1.908                   | 0.56                 |
| 2                                                                             | -3.262        | -1.812                   | 0.54                 |
| 3                                                                             | -3.239        | 0.460                    | 0.54                 |

| 18O leaving group KIE: delta of reactant (average of 3 determinations) = 0.553 |               |                          |                      |
|--------------------------------------------------------------------------------|---------------|--------------------------|----------------------|
| reaction #                                                                     | product delta | residual substrate delta | fraction of reaction |
| Bridge 1                                                                       | -6.975        | 6.241                    | 0.38                 |
| Bridge 2                                                                       | -5.89         | 7.13                     | 0.54                 |
| Bridge 3                                                                       | -6.811        | 7.39                     | 0.50                 |

| 18O nucleophile KIE: delta of reactant (average of 4 determinations) = -1.588 |               |                          |                      |
|-------------------------------------------------------------------------------|---------------|--------------------------|----------------------|
| reaction #                                                                    | product delta | residual substrate delta | fraction of reaction |
| Nuc 1                                                                         | -9.11         | 3.65                     | 0.495                |
| Nuc 2                                                                         | -9.37         | 4.92                     | 0.455                |
| Nuc 3                                                                         | -9.2          | 11.39                    | 0.596                |

**Kinetic Isotope Effect Data Analysis.** For each isotope effect at least three reactions were run. The  $^{15}\text{N}/^{14}\text{N}$  ratios were measured for the product ( $R_p$ ) and of the remaining starting material ( $R_s$ ) at partial reaction, as well as in the original mixture ( $R_o$ ). The isotope effects were calculated using equations 1 and 2.<sup>1</sup>

$$\text{isotope effect} = \log(1 - f) / \log[(1 - f)(R_s / R_o)] \quad (1)$$

$$\text{isotope effect} = \log(1 - f) / \log(1 - f(R_p / R_o)) \quad (2)$$

For each isotope effect the value calculated from  $R_o$  and  $R_p$  (equation 1) and from  $R_o$  and  $R_s$  (equation 2) agreed within experimental error and these were averaged to give the results reported. The  $^{15}\text{N}$  KIE is given directly from these equations. In the  $^{18}\text{O}$  isotope effect experiments the observed KIEs given by the above equations were corrected for the  $^{15}\text{N}$  isotope effect and for incomplete levels of isotopic incorporation.

#### **Calculation of corrected $^{18}\text{O}$ kinetic isotope effects**

In the  $^{18}\text{O}$  isotope effect experiments the observed KIEs were corrected for the  $^{15}\text{N}$  isotope effect and for incomplete levels of isotopic incorporation. The derivations of the equations used for these corrections have been described.<sup>2</sup> For remote label isotope effects using one  $^{18}\text{O}$  label the following equation is used:

$$^{18}k = \frac{^{15,18}ky}{^{15}k - [^{15,18}k - ^{15}k][(1-b)z/(bx)] - ^{15,18}k(1-y)}$$

where,

$^{15,18}k$  = the observed KIE due to both labels

$^{15}k$  = the  $^{15}\text{N}$  KIE

$^{18}k$  = the corrected  $^{18}\text{O}$  KIE

$b$  = the fraction of doubly labeled compound in the remote labeled mixture

$x$  = the fraction of  $^{15}\text{N}$  in the remote label position of the doubly labeled ( $^{15}\text{N}$ ,  $^{18}\text{O}$ ) compound used for mixing.

$y$  = the fraction of  $^{18}\text{O}$  in the doubly - labeled compound used for mixing

$z$  = the fraction of  $^{15}\text{N}$  in the remote label position of the  $^{14}\text{N}$  - labeled compound used for mixing.

For the labeled substrates and the mixtures used for the  $^{18}k_{\text{lg}}$  experiments, the fractions of isotopic isomers present as measured by mass spectrometry, used for the correction, were as follows:  $b=0.003665$ ,  $x=0.99$ ,  $y=0.81$ ,  $z=0.0002$ .

For the labeled substrates and the mixtures used for the  $^{18}k_{\text{nuc}}$  experiments, these values were as follows:  $b=0.003657$ ,  $x=0.99$ ,  $y=0.895$ ,  $z=0.0002$ .

## References

- (1) Bigeleisen, J.; Wolfsberg, M. *Adv. Chem. Phys.* 1958, 1, 15-76.
- (2) Cleland, W. W. In *Isotope effects in chemistry and biology*; Kohen, A., Limbach, H.-H., Eds.; CRC Press: Boca Raton, FL, 2006, p 915-930; Hermes, J. D.; Morrical, S. W.; O'Leary, M. H.; Cleland, W. W. *Biochemistry* 1984, 23, 5479-88.
